# Supplementary material
Source: PubMed Central journal article supplement (PMC7674129)
Supplement: mmc1.pdf [file mmc1.pdf]

**Cell Reports, Volume 33**

**Supplemental Information**

**The Roborovski Dwarf Hamster Is  
A Highly Susceptible Model for a Rapid  
and Fatal Course of SARS-CoV-2 Infection**

**Jakob Trimpert, Daria Vladimirova, Kristina Dietert, Azza Abdelgawad, Dusan Kunec, Simon Dökel, Anne Voss, Achim D. Gruber, Luca D. Bertzbach, and Nikolaus Osterrieder**

## The Roborovski dwarf hamster – a highly susceptible model for a rapid and fatal course of SARS-CoV-2 infection

Jakob Trimpert<sup>1,\*</sup>, Daria Vladimirova<sup>1</sup>, Kristina Dietert<sup>2,3</sup>, Azza Abdelgawad<sup>1</sup>, Dusan Kunec<sup>1</sup>, Simon Dökel<sup>2</sup>, Anne Voss<sup>2</sup>, Achim D. Gruber<sup>2</sup>, Luca D. Bertzbach<sup>1,5</sup> and Nikolaus Osterrieder<sup>1,4,5</sup>

<sup>1</sup>Institut für Virologie, Freie Universität Berlin, Berlin, Germany

<sup>2</sup>Institut für Tierpathologie, Freie Universität Berlin, Berlin, Germany

<sup>3</sup>Tiermedizinisches Zentrum für Resistenzforschung, Freie Universität Berlin, Berlin, Germany

<sup>4</sup>Department of Infectious Disease and Public Health, Jockey Club College of Veterinary Medicine and Life Sciences, City University of Hong Kong, Kowloon, Hong Kong

<sup>5</sup>These authors contributed equally

\*Correspondence: [trimpert.jakob@fu-berlin.de](mailto:trimpert.jakob@fu-berlin.de)

### Supplementary Materials

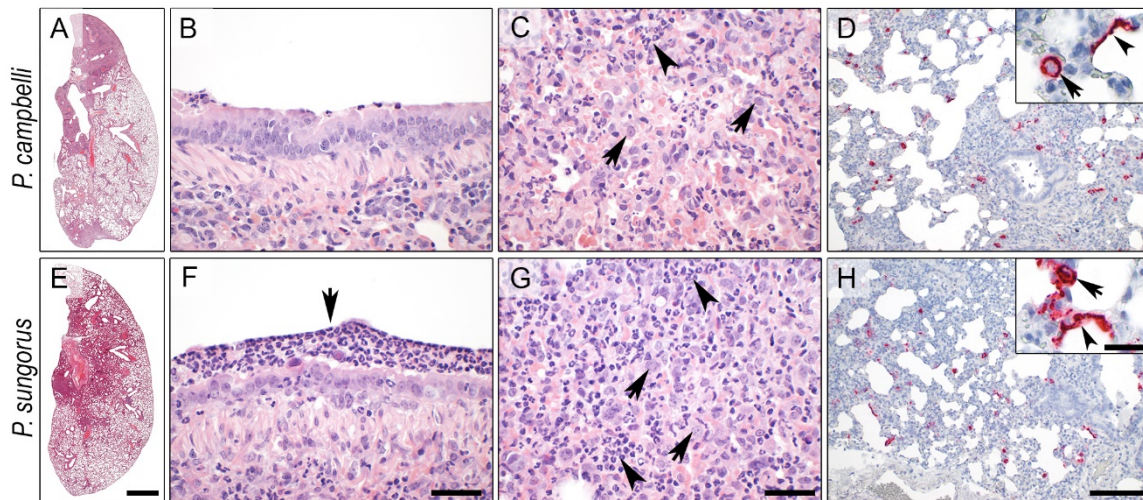

**Figure S1: Histopathology of further *Phodopus* species (related to Figure 4).** *Phodopus* (*P. campbelli* and *P. sungorus*) developed pneumonia after SARS-CoV2-standard dose infection similar to low dose infected *P. roborovskii* with multifocal consolidated areas (A, E). *P. campbelli* had only minimal bronchitis (B), necrosuppurative pneumonia with infiltration of mainly neutrophils (C, arrowhead) and strong initiation of regeneration by alveolar epithelial type II cells (AEC-II, C, arrows) at 3 dpi. *In situ*-hybridization localized viral RNA in bronchial epithelial cells, AEC-I (arrowhead), AEC-II (arrow) and alveolar macrophages associated with areas of inflammation. *P. sungorus* developed marked necrosuppurative bronchitis (F, arrow) and pneumonia at 3 dpi with stronger infiltration of neutrophils (G, arrowheads) and also prominent regeneration of AEC-II (G, arrows) at 3 dpi. Viral RNA was detected with virtually identical distribution and cellular tropism as observed in *P. campbelli*. Red, viral RNA signals; blue, hemalaun counterstain. Bars 1 mm (A, E), 50  $\mu$ m, (B, C, F, G), 200  $\mu$ m (D, H) and 20  $\mu$ m (insets in D, H).

|                      |                                                                          |     |
|----------------------|--------------------------------------------------------------------------|-----|
| Cricetulus griseus   | MSSSSWLLLSLVAVTTAQSII EEQAKTFLDKFNQEAEDLSYQSALASWNYNTNI TEENAQ           | 60  |
| Mesocricetus auratus | MSSSSWLLLSLVAVTTAQSII EEQAKTFLDKFNQEAEDLSYQSALASWNYNTNI TEENAQ           | 60  |
| Phodopus campbelli   | MSSSSWLLLSLVAVTTAQSII EEQAKTFLDKFNQEAEDLSYQSALASWNYNTNI TEENAQ           | 60  |
| Phodopus sungorus    | MSSSSWLLLSLVAVTTAQSII EEQAKTFLDKFNQEAEDLSYQSALASWNYNTNI TEENAQ           | 60  |
| Phodopus roborovskii | MSSSSWLLLSLVAVTTAQSII EEQAKTFLDKFNQEAEDLSYQSALASWNYNTNI TEENAQ<br>*****  | 60  |
| Cricetulus griseus   | KMNEAAKWSAFYEEQSKLAKNYSLQEVQNLII KRQLQALQQSGSSALSADKKNQLNTIL             | 120 |
| Mesocricetus auratus | KMNEAAKWSAFYEEQSKLAKNYSLQEVQNLII KRQLQALQQSGSSALSADKKNQLNTIL             | 120 |
| Phodopus campbelli   | KMNEAAKWSAFYEEQSKLAKNYSLQEVQNLII KRQLQALQQSGSSALSADKKNQLNTIL             | 120 |
| Phodopus sungorus    | KMNEAAKWSAFYEEQSKLAKNYSLQEVQNLII KRQLQALQQSGSSALSADKKNQLNTIL             | 120 |
| Phodopus roborovskii | KMNEAAKWSAFYEEQSKLAKNYSLQEVQNLII KRQLQALQQSGSSALSADKKNQLNTIL<br>*****    | 120 |
| Cricetulus griseus   | NTMSTIYSTGKVCNPKNFQECLELLEPGLDDIMATSTDYNERLWAWEGWRAEVGKQLRPLY            | 180 |
| Mesocricetus auratus | NTMSTIYSTGKVCNPKNFQECLELLEPGLDDIMATSTDYNERLWAWEGWRAEVGKQLRPLY            | 180 |
| Phodopus campbelli   | NTMSTIYSTGKVCNPKNFQECLELLEPGLDDIMATSTDYNERLWAWEGWRAEVGKQLRPLY            | 180 |
| Phodopus sungorus    | NTMSTIYSTGKVCNPKNFQECLELLEPGLDDIMATSTDYNERLWAWEGWRAEVGKQLRPLY            | 180 |
| Phodopus roborovskii | NTMSTIYSTGKVCNPKNFQECLELLEPGLDDIMATSTDYNERLWAWEGWRAEVGKQLRPLY<br>*****   | 180 |
| Cricetulus griseus   | EYVVLKNEMARANNYKDYGYWRGDYEAEGADGYNYNGNQLIEDVERTFKEIKPLYEQL               | 240 |
| Mesocricetus auratus | EYVVLKNEMARANNYKDYGYWRGDYEAEGADGYNYNGNQLIEDVERTFKEIKPLYEQL               | 240 |
| Phodopus campbelli   | EYVVLKNEMARANNYKDYGYWRGDYEAEGADGYNYNGNQLIEDVERTFKEIKPLYEQL               | 240 |
| Phodopus sungorus    | EYVVLKNEMARANNYKDYGYWRGDYEAEGADGYNYNGNQLIEDVERTFKEIKPLYEQL               | 240 |
| Phodopus roborovskii | EYVVLKNEMARANNYKDYGYWRGDYEAEGADGYNYNGNQLIEDVERTFKEIKPLYEQL<br>*****      | 240 |
| Cricetulus griseus   | HAYVRTKLMDTYPSYISPTGCLPAHLLGDMWGRFNTNLYPLTVFPFGQKFNIDVTDAMVQ             | 300 |
| Mesocricetus auratus | HAYVRTKLMNTYPSYISPTGCLPAHLLGDMWGRFNTNLYPLTVFPFGQKFNIDVTDAMVQ             | 300 |
| Phodopus campbelli   | HAYVRTKLVNTYPSYISPTGCLPAHLLGDMWGRFNTNLYPLTVFPFGQKFNIDVTDAMVQ             | 300 |
| Phodopus sungorus    | HAYVRTKLVNTYPSYISPTGCLPAHLLGDMWGRFNTNLYPLTVFPFGQKFNIDVTDAMVQ             | 300 |
| Phodopus roborovskii | HAYVRTKLMDTYPSYISPTGCLPAHLLGDMWGRFNTNLYPLTVFPFGQKFNIDVTDAMVQ<br>*****    | 300 |
| Cricetulus griseus   | GWDAERIFKEAEKFFVSVGLPHMTQGFQWNSMLTDPGDRKVVCHPTAWDLGKGFRIKM               | 360 |
| Mesocricetus auratus | GWNAERIFKEAEKFFVSVGLPYMTQGFQWNSMLTDPGDRKVVCHPTAWDLGKGFRIKM               | 360 |
| Phodopus campbelli   | GWGAERIFKEAEKFFVSVGLPHMTQGFQWNSMLTDPGDRKVVCHPTAWDLGKGFRIKM               | 360 |
| Phodopus sungorus    | GWDAERIFKEAEKFFVSVGLPHMTQGFQWNSMLTDPGDRKVVCHPTAWDLGKGFRIKM               | 360 |
| Phodopus roborovskii | GWDAERIFKEAEKFFVSVGLPHMTQGFQWNSMLTDPGDRKVVCHPTAWDLGKGFRIKM<br>*****      | 360 |
| Cricetulus griseus   | CTKVTMDNFLTAAHEMGHIQYDMAYATQPFLLRNGANEGFHEAVGEIMLSAATPKHLKS              | 420 |
| Mesocricetus auratus | CTKVTMDNFLTAAHEMGHIQYDMAYATQPFLLRNGANEGFHEAVGEIMLSAATPEHLKS              | 420 |
| Phodopus campbelli   | CTKVTMDNFLTAAHEMGHIQYDMAYATQPFLLRNGANEGFHEAVGEIMLSAATPEHLKS              | 420 |
| Phodopus sungorus    | CTKVTMDNFLTAAHEMGHIQYDMAYATQPFLLRNGANEGFHEAVGEIMLSAATPEHLKS              | 420 |
| Phodopus roborovskii | CTKVTMDNFLTAAHEMGHIQYDMAYATQPFLLRNGANEGFHEAVGEIMLSAATPEHLKS<br>*****     | 420 |
| Cricetulus griseus   | IGLLPSNFHEDNETEINFLKQALITVGLPFTYMLEKWRWVMPKGDIPKEQWMEKWEM                | 480 |
| Mesocricetus auratus | IGLLPSDFQEDNETEINFLKQALITVGLPFTYMLEKWRWVMPKGDIPKEQWMEKWEM                | 480 |
| Phodopus campbelli   | IGLLPSNFQEDSETEINFLKQALITVGLPFTYMLEKWRWVMPKGDIPKEQWMEKWEM                | 480 |
| Phodopus sungorus    | IGLLPSNFQEDSETEINFLKQALITVGLPFTYMLEKWRWVMPKGDIPKEQWMEKWEM                | 480 |
| Phodopus roborovskii | IGLLPSNFQEDSETEINFLKQALITVGLPFTYMLEKWRWVMPKGDIPKEQWMEKWEM<br>*****       | 480 |
| Cricetulus griseus   | KREIVGVVEPLPHDETYCDPAALPHVSNDFSFIRYRTTIIYQFQFQALCQAAKHDGFLH              | 540 |
| Mesocricetus auratus | KREIVGVVEPLPHDETYCDPAALPHVSNDFSFIRYRTTIIYQFQFQALCQAAKHDGFLH              | 540 |
| Phodopus campbelli   | KREIVGVVEPLPHDETYCDPAALPHVSNDFSFIRYRTTIIYQFQFQALCQAAKHDGFLH              | 540 |
| Phodopus sungorus    | KREIVGVVEPLPHDETYCDPAALPHVSNDFSFIRYRTTIIYQFQFQALCQAAKHDGFLH              | 540 |
| Phodopus roborovskii | KREIVGVVEPLPHDETYCDPAALPHVSNDFSFIRYRTTIIYQFQFQALCQAAKHDGFLH<br>*****     | 540 |
| Cricetulus griseus   | KCDISNSTEAGQKLLNMLRLGKSEPWTLALENVVGARNMDVRPLLNYFEPLSVWLKEQNK             | 600 |
| Mesocricetus auratus | KCDISNSTEAGQKLLNMLRLGKSEPWTLALENVVGARNMDVRPLLNYFEPLSVWLKEQNK             | 600 |
| Phodopus campbelli   | KCDISNSTEAGQKLVNMLRLGKSGPWTLALENVVGARNMDVRPLLNYFEPLSVWLKEQNK             | 600 |
| Phodopus sungorus    | KCDISNSTEAGQKLVNMLRLGKSEPWTLALENVVGARNMDVRPLLNYFEPLSVWLKEQNK             | 600 |
| Phodopus roborovskii | KCDISNSTEAGQKLLNMLRLGKSEPWTLALENVVGARNMDVRPLLNYFEPLSVWLKEQNK<br>*****    | 600 |
| Cricetulus griseus   | NSFVGWNTDWSPYADQS IKVRI SLKSALGENAYEWNDDNEMYLFRASVAYAMRVYPAKNKT          | 660 |
| Mesocricetus auratus | NSFVGWNTDWSPYADQS IKVRI SLKSALGENAYEWNDDNEMYLFRASVAYAMRVYPAKNKT          | 660 |
| Phodopus campbelli   | NSFVGWNTDWSPYADQS IKVRI SLKSALGENAYVWDDNEMYLFRASVAYAMRVYPAKNKT           | 660 |
| Phodopus sungorus    | NSFVGWNTDWSPYADQS IKVRI SLKSALGENAYVWDDNEMYLFRASVAYAMRVYPAKNKT           | 660 |
| Phodopus roborovskii | NSFVGWNTDWSPYADQS IKVRI SLKSALGENAYEWNDDNEMYLFRASVAYAMRVYPAKNKT<br>***** | 660 |
| Cricetulus griseus   | QTVLFGVEDIRVSDLKPRVSNFVFTSPQNMSDII PRNEVEEAVRFSRGRINDVFGLLDN             | 720 |
| Mesocricetus auratus | QTVPFVGEDIRVSDLKPRVSNFVFTSPQNMSDII PRNEVEEAVRFSRGRINDVFGLLDN             | 720 |
| Phodopus campbelli   | QIVPFVGEDIRVSDLTFRVSNFVFTSPQNMSDII PRNEVEEAVRFSRGRINDVFGLLDN             | 720 |
| Phodopus sungorus    | QIVPFVGEDIRVSDLTFRVSNFVFTSPQNMSDII PRNEVEEAVRFSRGRINDVFGLLDN             | 720 |
| Phodopus roborovskii | QTVPFVGEDIRVSDLTFRVSNFVFTSPQNMSDII PRNEVEEAVRFSRGRINDVFGLLDN<br>*****    | 720 |
| Cricetulus griseus   | SLEFLGINPTLAPPYQPPVTIWLII FGVVMGIVVVGIVLIVTGIRAKKKNNEAKREENP             | 780 |
| Mesocricetus auratus | SLEFLGINPTLSPPYQPPVTIWLII FGVVMGIVVVGII LILIFTGIGRKKKNETKREENP           | 780 |
| Phodopus campbelli   | SLEFLGINPTLAPPYQPPVTIWLII FGVVMGIVVVGIVLIVTGIRAKKKNNEAKREENP             | 780 |
| Phodopus sungorus    | SLEFLGINPTLAPPYQPPVTIWLII FGVVMGIVVVGIVLIVTGIRAKKKNNEAKREENP             | 780 |
| Phodopus roborovskii | SLEFLGINPTLAPPYQPPVTIWLII FGVVMGIVVVGII LILIVTGIRAKKKNNEAKREENP<br>***** | 780 |
| Cricetulus griseus   | YDSVDIGKGESNAGFQSNDDVQTSF                                                | 805 |
| Mesocricetus auratus | YDSVDIGKGESNAGFLSNDDAQTFS                                                | 805 |
| Phodopus campbelli   | YASTDIGKGESNAGFQSNDDAQTFS                                                | 805 |
| Phodopus sungorus    | YDSTDIGKGESNAGFQSNDDAQTFS                                                | 805 |
| Phodopus roborovskii | YDSMDIGKGESNAGFQSNDDAQTFS<br>*****                                       | 805 |

Figure S2 – Amino acid alignment of Hamster ACE-2 sequences (related to Figure 5).

**Table S1: SARS-CoV-2 blood titers and virus loads in brains of infected Roborovski dwarf hamsters (related to Figures 2 and 3).** Presented as means  $\pm$  standard deviations of standard dose-infected (SD, n = 10) and low dose-infected Roborovski dwarf hamsters (LD, n = 3).

| d.p.i. | Blood titers (SD)                     | Blood titers (LD) | Virus RNA copies (brains, SD)         | Virus RNA copies (brains, LD) |
|--------|---------------------------------------|-------------------|---------------------------------------|-------------------------------|
| 2      | all < 100                             | all < 100         | 0                                     | n.a.                          |
| 3      | $3.9 \times 10^4 \pm 7.9 \times 10^4$ |                   | $4.8 \times 10^1 \pm 1.1 \times 10^2$ |                               |

**Table S2: Comparison of pathologies and distribution of viral RNA in Phodopus species following SARS-CoV-2 infection (related to Figure 4).**

| Evaluation criteria                                   | Roborovski standard dose | Roborovski low dose | Campbell standard dose | Djungarian standard dose |
|-------------------------------------------------------|--------------------------|---------------------|------------------------|--------------------------|
| Histopathology                                        |                          |                     |                        |                          |
| Distribution                                          | diffuse                  | multifocal          | multifocal             | multifocal               |
| Alveolar damage                                       | ++                       | +                   | +                      | +                        |
| Bronchitis                                            | +/-                      | +                   | +                      | ++                       |
| Pneumonia                                             | +/-                      | ++                  | ++                     | ++                       |
| Endothelialitis                                       | -                        | +/-                 | -                      | -                        |
| Hyaline thrombi                                       | ++                       | -                   | -                      | -                        |
| Edema                                                 | +                        | +                   | +/-                    | -                        |
| Regeneration AEC                                      | -                        | ++                  | ++                     | ++                       |
| Regeneration BEC                                      | -                        | +                   | -                      | -                        |
| SARS-CoV-2 detection by <i>in situ</i> -hybridization |                          |                     |                        |                          |
| AEC I                                                 | -                        | -                   | ++                     | ++                       |
| AEC II                                                | ++                       | ++                  | ++                     | ++                       |
| BEC                                                   | +                        | +                   | +                      | +                        |
| Macrophages                                           | +                        | +                   | +                      | +                        |

++ main lesion, + observed, +/- variable, - not observed, AEC = alveolar epithelial cells, BEC = bronchial epithelial cells

**Table S3: Oligonucleotides used in this study (related to the STAR Methods section).**

| Primer/probe            | Sequence 5'-3'                     |
|-------------------------|------------------------------------|
| SARS-CoV-2 qPCR forward | ACAGGTACGTTAATAGTTAATAGCGT         |
| SARS-CoV-2 qPCR reverse | ATATTGCAGCAGTACGCACACA             |
| SARS-CoV-2 qPCR probe   | FAM-ACACTAGCCATCCTTACTGCGCTTCG-BHQ |
| ACE2 seq forward 1      | TCCTGGCTCCTTCTCAG                  |
| ACE2 seq forward 2      | GACAAGTTTAACCAGGAAGCT              |
| ACE2 seq forward 3      | CCAAAAGATGAATGAGGCTG               |
| ACE2 seq reverse 1      | TTCCTTCAACTTCTTTGTCACT             |
| ACE2 seq reverse 2      | WGTACCATATGGCTGATT                 |
| ACE2 seq reverse 3      | TGATGAYGYTCAGACTTCATTTTAG          |
